# Supplementary material
Source: publisher site journal article supplement (https://www.dovepress.com/article/320172)
Supplement: Supplementary file 1 [file get_supplementary_file.php]

**Supplemental material**


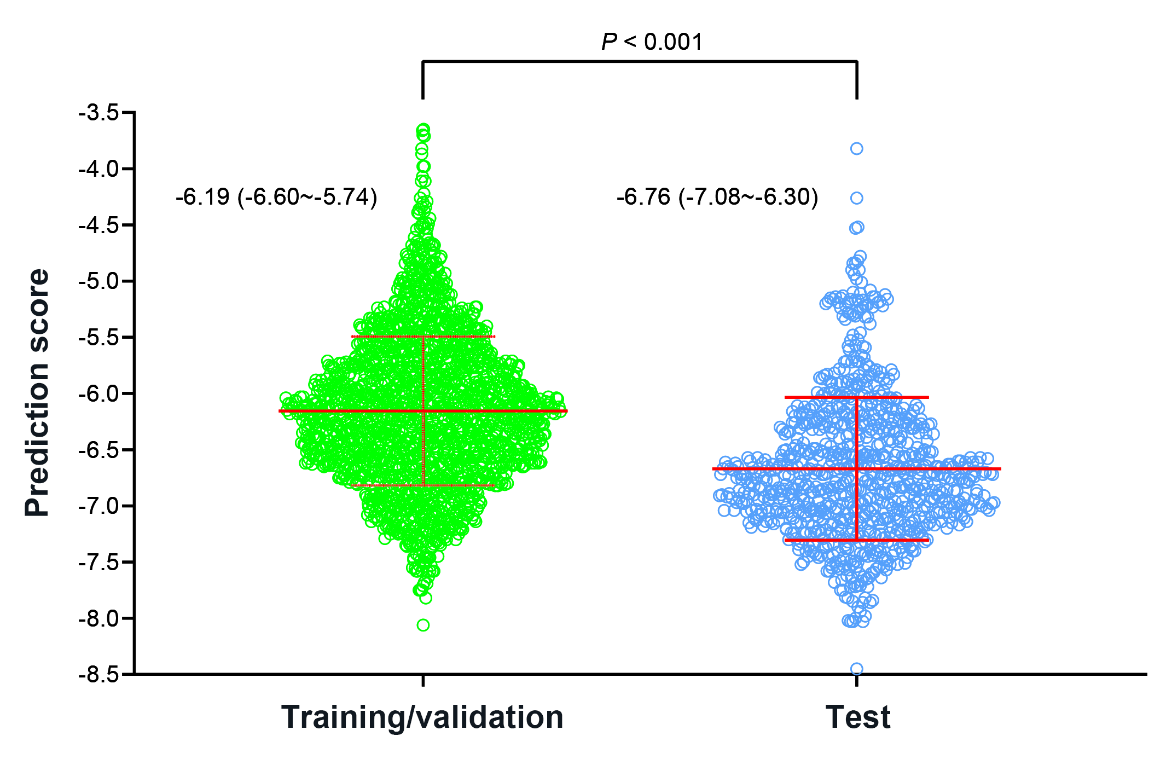


**Figure S1** Scatter plot of machine learning-based prediction scores in the training/validation and test cohort. Scores are reported as median (interquartile range).


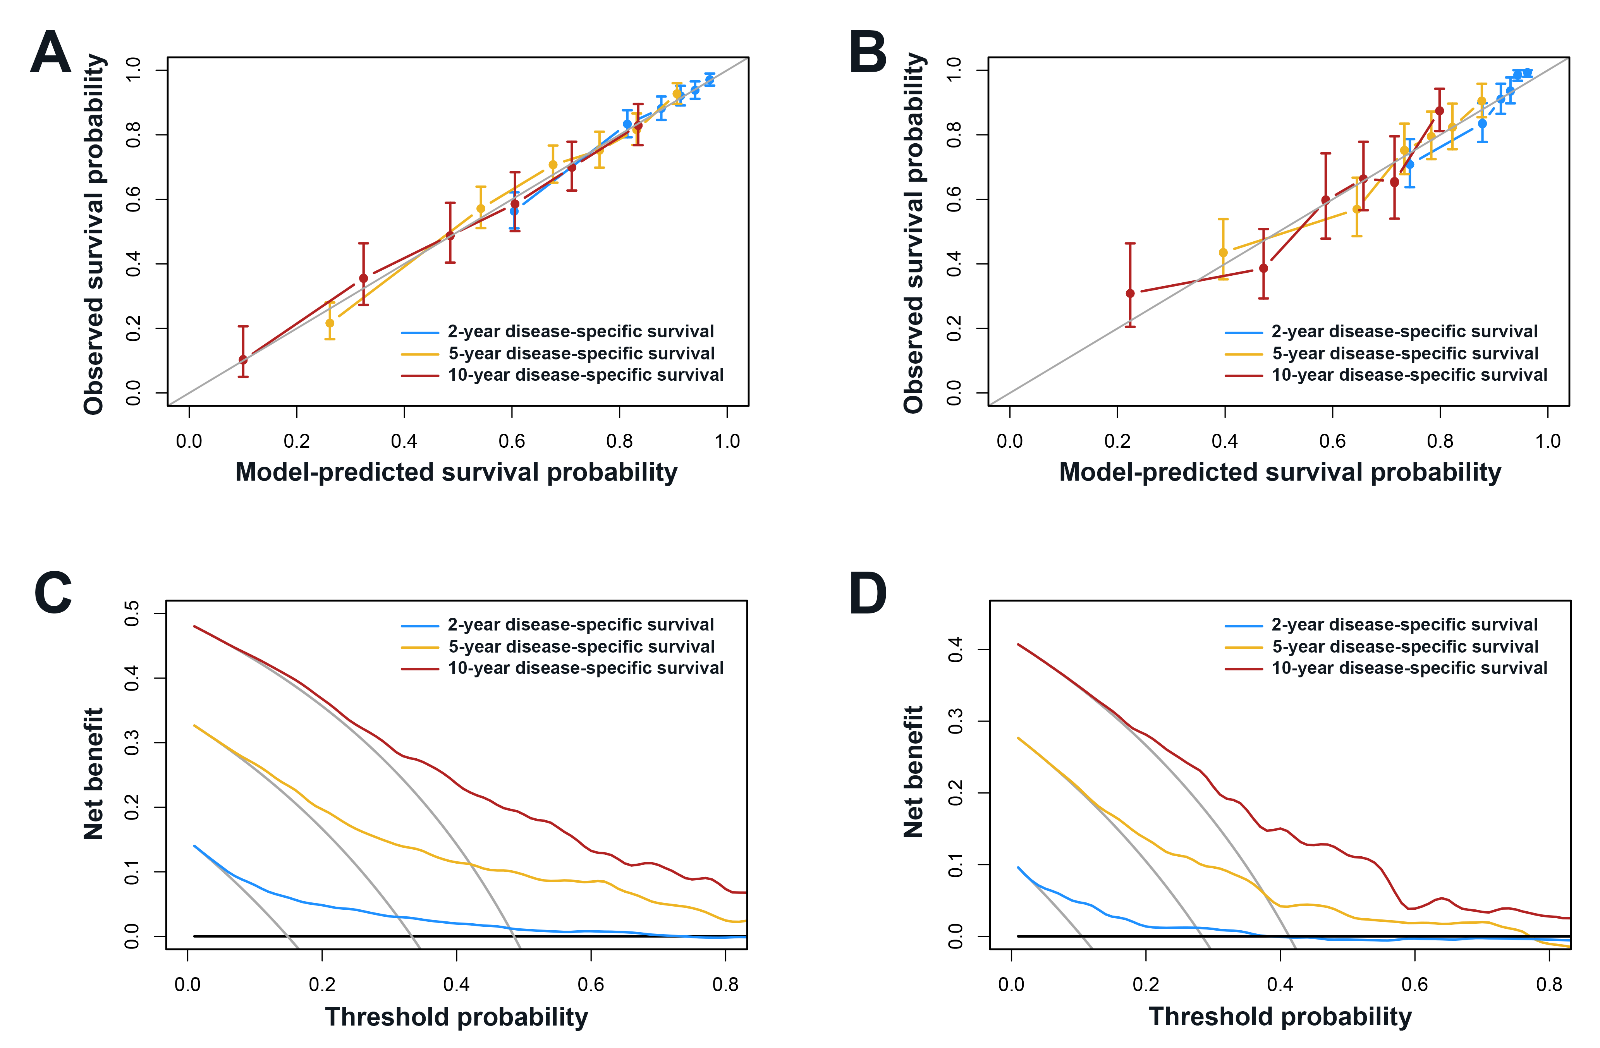
**Figure S2** Performance of the machine-learning model. Calibration curves of predicted compared with observed disease-specific survival probability at 2, 5, and 10 years in the training/validation (A) and the test (B) cohort. Decision curve analysis comparing the model with other strategies for the prediction of 2-, 5-, and 10-year disease-specific survival in the training/validation (C) and the test (D) cohort. The y-axis measures the net benefit at a given threshold probability, which is estimated by summing the benefits (true-positive results) and subtracting the harms (false-positive results), weighting the latter by a factor related to the relative harm of an undetected disease compared with the harm of unnecessary treatment. The gray line represents the treat-all strategy (assuming all die of this disease), and the black line represents the treat-none strategy (assuming none die of this disease). Across the majority of the range of reasonable threshold probabilities, machine-learning model provided greater net benefits compared with other strategies.


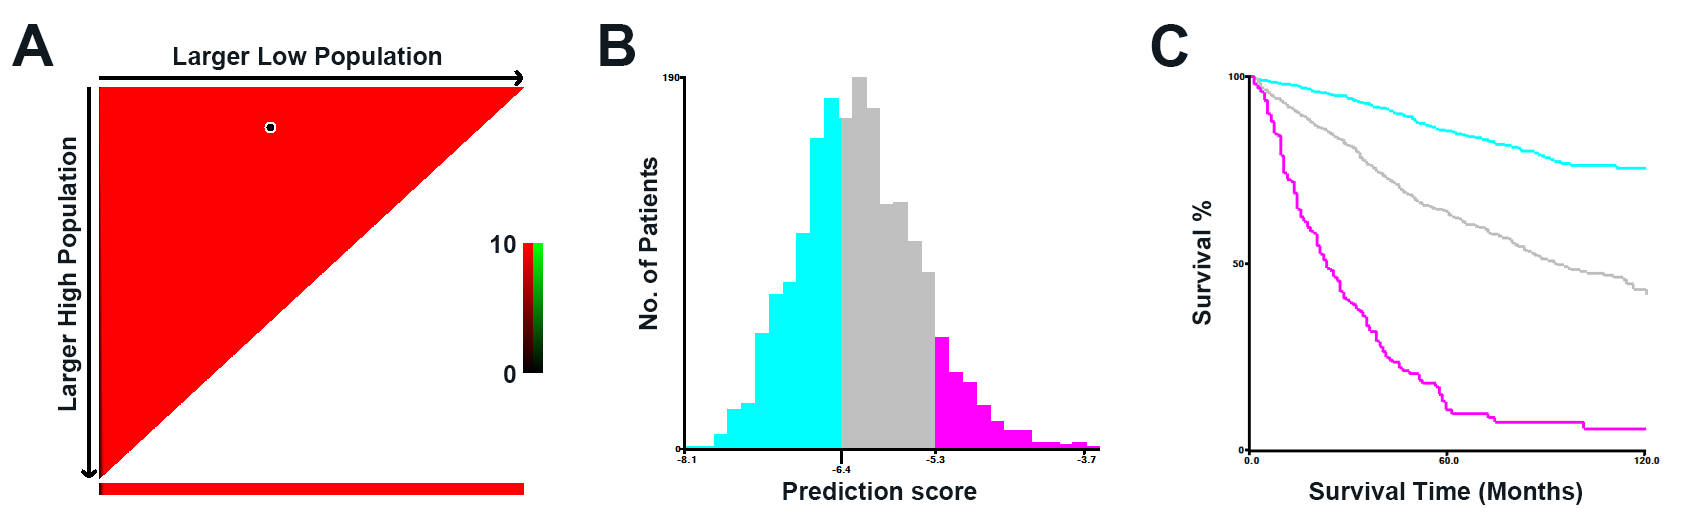


**Figure S3** Determination of the optimal cutoffs for the gradient boosting machine using X-tile analysis. The optimal cutoffs highlighted by black circle (A) are detailed in histogram of the training/validation cohort (B) with corresponding Kaplan-Meier curves (C).

**Table S1** Model performance in sub-cohorts stratified by the integrity of model covariates

| **Sub-cohort with complete covariates (n=1201)** a | **C-statistic (95% CI)** | ***P*-value** |
| --- | --- | --- |
| GBM model | 0.728 (0.701-0.756) | ref |
| AJCC 8th edition | 0.631 (0.601-0.662) | <0.001 |
| AJCC 7th edition | 0.632 (0.604-0.660) | <0.001 |
| **Sub-cohort with missing covariates (n=1577)** a |  |  |
| GBM model | 0.725 (0.703-0.746) | ref |
| AJCC 8th edition | 0.601 (0.577-0.624) | <0.001 |
| AJCC 7th edition | 0.599 (0.577-0.620) | <0.001 |

a Covariates refer to the variables included in GBM model.

Abbreviations: CI, confidence interval; GBM, gradient boosting machine; AJCC, American Joint Committee on Cancer.

**Table S2** Comparison of GBM model versus simple strategy

| **Strategy** | **N** | **Clinicopathologic features** | | | **C-statistic (95% CI)** | | ***P*-value** |
| --- | --- | --- | --- | --- | --- | --- | --- |
| **Multifocality** | **Vascular invasion** | **Severe fibrosis or cirrhosis** | **Simple strategy** | **GBM model** |
| One feature | 2766 | √ |  |  | 0.565 (0.550-0.580) | 0.727 (0.710-0.744) | <0.001 |
|  | 2685 |  | √ |  | 0.572 (0.557-0.588) | 0.724 (0.706-0.741) | <0.001 |
|  | 1655 |  |  | √ | 0.583 (0.561-0.606) | 0.723 (0.700-0.745) | <0.001 |
| Two features | 2685 | √ | √ |  | 0.610 (0.593-0.628) | 0.724 (0.706-0.741) | <0.001 |
|  | 1651 | √ |  | √ | 0.629 (0.606-0.652) | 0.722 (0.700-0.745) | <0.001 |
|  | 1619 |  | √ | √ | 0.634 (0.610-0.658) | 0.718 (0.695-0.741) | <0.001 |
| Three features | 1619 | √ | √ | √ | 0.667 (0.644-0.689) | 0.718 (0.695-0.741) | <0.001 |

NOTE. The performance of simple strategy was evaluated and compared with GBM model in sub-cohort with complete strategy-related information.

Abbreviations: GBM, gradient boosting machine; CI, confidence interval.

**Table S3** Comparison of baseline characteristics among risk groups in the entire cohort (n=2778)

| **Variables** | **Low**  **(n=1394)** | **Intermediate**  **(n=1142)** | **High**  **(n=242)** | ***P*-value** |
| --- | --- | --- | --- | --- |
| Age, years | 59.0 (50.0-65.0) | 61.0 (55.0-68.0) | 62.0 (54.0-70.0) | <0.001 |
| Gender |  |  |  | 0.966 |
| Male | 1043 (74.8) | 856 (75.0) | 183 (75.6) |  |
| Female | 351 (25.2) | 286 (25.0) | 59 (24.4) |  |
| Race |  |  |  | <0.001 |
| White | 273 (19.6) | 642 (56.2) | 105 (43.4) |  |
| Asian/Pacifific Islander | 1061 (76.1) | 340 (29.8) | 76 (31.4) |  |
| Black/American Indian/Alaskan | 56 (4.0) | 158 (13.8) | 61 (25.2) |  |
| Unknown | 4 (0.3) | 2 (0.2) | 0 (0.0) |  |
| Year of diagnosis |  |  |  | <0.001 |
| Year 2010 and before | 439 (31.5) | 500 (43.8) | 113 (46.7) |  |
| Year 2011 and after | 955 (68.5) | 642 (56.2) | 129 (53.3) |  |
| Neoadjuvant therapy |  |  |  | 0.012 |
| No | 1340 (96.1) | 1075 (94.1) | 221 (91.3) |  |
| Yes | 45 (3.2) | 54 (4.7) | 16 (6.6) |  |
| Unknown | 9 (0.7) | 13 (1.2) | 5 (2.1) |  |
| Multifocal |  |  |  | <0.001 |
| No | 1330 (95.4) | 856 (75.0) | 113 (46.7) |  |
| Yes | 64 (4.6) | 279 (24.4) | 124 (51.2) |  |
| Unknown | 0 (0.0) | 7 (0.6) | 5 (2.1) |  |
| Vascular invasion |  |  |  | <0.001 |
| No | 1325 (95.1) | 874 (76.5) | 82 (33.9) |  |
| Yes | 67 (4.8) | 216 (18.9) | 121 (50.0) |  |
| Unknown | 2 (0.1) | 52 (4.6) | 39 (16.1) |  |
| Histological grade |  |  |  | <0.001 |
| Well-differentiated | 341 (24.5) | 206 (18.0) | 16 (6.6) |  |
| Moderately differentiated | 704 (50.5) | 511 (44.7) | 89 (36.8) |  |
| Poorly differentiated or undifferentiated | 254 (18.2) | 301 (26.4) | 101 (41.7) |  |
| Unknown | 95 (6.8) | 124 (10.9) | 36 (14.9) |  |
| Tumor size, cm | 2.8 (2.0-3.6) | 3.2 (2.5-4.0) | 4.0 (3.0-4.8) | <0.001 |
| Alpha-fetoprotein level |  |  |  | <0.001 |
| Normal | 543 (39.0) | 271 (23.7) | 35 (14.5) |  |
| Elevated | 570 (40.9) | 571 (50.0) | 163 (67.3) |  |
| Unknown or undetermined | 281 (20.1) | 300 (26.3) | 44 (18.2) |  |
| Fibrosis score |  |  |  | <0.001 |
| None to moderate fibrosis | 658 (47.2) | 155 (13.6) | 30 (12.4) |  |
| Severe fibrosis or cirrhosis | 331 (23.7) | 384 (33.6) | 97 (40.1) |  |
| Unknown | 405 (29.1) | 603 (52.8) | 115 (47.5) |  |
| Type of surgery |  |  |  | <0.001 |
| Wedge or segmental resection | 1056 (75.8) | 789 (69.1) | 165 (68.2) |  |
| Lobectomy | 248 (17.8) | 234 (20.5) | 52 (21.5) |  |
| Extended lobectomy or other hepatectomy | 90 (6.4) | 119 (10.4) | 25 (10.3) |  |

Continuous variables reported as median (interquartile range) and categorical variables reported as number (percentage).

**Table S4** Baseline characteristics of patients treated with resection or transplantation in SEER-Medicare database

| **Variables** | **Resection**  **(n=1899)** | **Transplantation**  **(n=2124)** | ***P*-value** |
| --- | --- | --- | --- |
| Age, years | 62.0 (56.0-69.0) | 58.0 (53.0-62.0) | <0.001 |
| Gender |  |  | <0.001 |
| Male | 1380 (72.7) | 1671 (78.7) |  |
| Female | 519 (27.3) | 453 (21.3) |  |
| Race |  |  | <0.001 |
| White | 1020 (53.7) | 1625 (76.5) |  |
| Asian/Pacifific Islander | 598 (31.5) | 274 (12.9) |  |
| Black/American Indian/Alaskan | 275 (14.5) | 209 (9.8) |  |
| Unknown | 6 (0.3) | 16 (0.8) |  |
| Year of diagnosis |  |  | <0.001 |
| Year 2010 and before | 881 (46.4) | 1300 (61.2) |  |
| Year 2011 and after | 1018 (53.6) | 824 (38.8) |  |
| Neoadjuvant therapy |  |  | <0.001 |
| No | 1802 (94.9) | 1369 (64.5) |  |
| Yes | 70 (3.7) | 680 (32.0) |  |
| Unknown | 27 (1.4) | 75 (3.5) |  |
| Multifocality |  |  | <0.001 |
| No | 1562 (82.3) | 1233 (58.1) |  |
| Yes | 325 (17.1) | 881 (41.5) |  |
| Unknown | 12 (0.6) | 10 (0.4) |  |
| Vascular invasion |  |  | <0.001 |
| No | 1516 (79.8) | 1569 (73.9) |  |
| Yes | 290 (15.3) | 193 (9.1) |  |
| Unknown | 93 (4.9) | 362 (17.0) |  |
| Histological grade |  |  | <0.001 |
| Well-differentiated | 407 (21.4) | 508 (23.9) |  |
| Moderately differentiated | 920 (48.4) | 834 (39.3) |  |
| Poorly differentiated or undifferentiated | 360 (19.0) | 171 (8.0) |  |
| Unknown | 212 (11.2) | 611 (28.8) |  |
| Tumor size, cm | 3.0 (2.3-4.0) | 2.5 (1.7-3.3) | <0.001 |
| Alpha-fetoprotein level |  |  | 0.983 |
| Normal | 566 (29.8) | 631 (29.7) |  |
| Elevated | 920 (48.4) | 1026 (48.3) |  |
| Unknown or undetermined | 413 (21.8) | 467 (22.0) |  |
| Fibrosis score |  |  | <0.001 |
| None to moderate fibrosis | 337 (17.7) | 91 (4.3) |  |
| Severe fibrosis or cirrhosis | 441 (23.3) | 870 (41.0) |  |
| Unknown | 1121 (59.0) | 1163 (54.7) |  |
| Median DSS time, months* | 138.0 (114.0-undefined) | undefined | <0.001† |

Continuous variables reported as median (interquartile range) and categorical variables reported as number (percentage).

* Numbers in parentheses are 95% confidence interval; † *P* value calculated by log-rank test.

Abbreviations: SEER, Surveillance, Epidemiology, and End Results; DSS, disease-specific survival.

**Table S5** Disease-specific survival of patients treated with resection versus transplantation before and after PSM analysis in SEER-Medicare database

| **Study cohort** | **Median time, months**  **(95% CI)** | **2-year rate, %**  **(95% CI)** | **5-year rate, %**  **(95% CI)** | **10-year rate, %**  **(95% CI)** | **Hazard ratio**  **(95% CI)** | ***P*-value** |
| --- | --- | --- | --- | --- | --- | --- |
| **Entire cohort** |  |  |  |  |  |  |
| Before PSM |  |  |  |  |  |  |
| LR (n=1899) | 138.0 (114.0-undefined) | 85.1 (83.5-86.8) | 66.7 (64.3-69.1) | 51.5 (48.0-55.2) | 1 |  |
| LT (n=2124) | undefined | 94.3 (93.3-95.3) | 87.3 (85.8-88.9) | 81.2 (79.2-83.4) | 0.342 (0.300-0.389) | <0.001 |
| After PSM |  |  |  |  |  |  |
| LR (n=946) | 138.0 (111.0-undefined) | 85.2 (83.0-87.6) | 66.4 (63.2-69.9) | 51.2 (46.8-56.1) | 1 |  |
| LT (n=946) | undefined | 95.1 (93.7-96.5) | 88.2 (85.9-90.5) | 79.7 (76.2-83.3) | 0.342 (0.285-0.410) | <0.001 |
| **Low-risk cohort** |  |  |  |  |  |  |
| Before PSM |  |  |  |  |  |  |
| LR (n=760) | undefined | 95.2 (93.7-96.8) | 85.5 (82.7-88.5) | 75.6 (71.1-80.3) | 1 |  |
| LT (n=2124) | undefined | 94.3 (93.3-95.3) | 87.3 (85.8-88.9) | 81.2 (79.2-83.4) | 0.850 (0.679-1.064) | 0.138 |
| After PSM |  |  |  |  |  |  |
| LR (n=420) | undefined | 95.3 (93.2-97.4) | 85.4 (81.7-89.4) | 75.6 (70.2-81.4) | 1 |  |
| LT (n=420) | undefined | 95.0 (92.9-97.2) | 88.8 (85.5-92.2) | 81.6 (76.7-86.8) | 0.802 (0.561-1.145) | 0.226 |
| **Intermediate-risk cohort** |  |  |  |  |  |  |
| Before PSM |  |  |  |  |  |  |
| LR (n=948) | 93.0 (83.0-114.0) | 84.6 (82.3-87.0) | 63.0 (59.6-66.7) | 41.8 (36.7-47.6) | 1 |  |
| LT (n=2124) | undefined | 94.3 (93.3-95.3) | 87.3 (85.8-88.9) | 81.2 (79.2-83.4) | 0.287 (0.241-0.343) | <0.001 |
| After PSM |  |  |  |  |  |  |
| LR (n=615) | 107.0 (90.0-123.0) | 83.8 (80.9-86.8) | 65.6 (61.5-69.9) | 43.8 (37.9-50.7) | 1 |  |
| LT (n=615) | undefined | 93.9 (92.0-95.9) | 86.9 (84.1-89.9) | 79.3 (75.1-83.7) | 0.326 (0.262-0.406) | <0.001 |
| **High-risk cohort** |  |  |  |  |  |  |
| Before PSM |  |  |  |  |  |  |
| LR (n=191) | 23.0 (20.0-28.0) | 48.2 (41.5-55.9) | 10.9 (6.6-18.2) | 5.7 (2.4-13.6) | 1 |  |
| LT (n=2124) | undefined | 94.3 (93.3-95.3) | 87.3 (85.8-88.9) | 81.2 (79.2-83.4) | 0.086 (0.055-0.136) | <0.001 |
| After PSM |  |  |  |  |  |  |
| LR (n=133) | 25.0 (22.0-33.0) | 51.6 (43.7-61.0) | 12.0 (6.8-21.4) | 6.0 (2.1-17.4) | 1 |  |
| LT (n=133) | undefined | 91.3 (86.6-96.4) | 84.7 (78.1-91.9) | 76.4 (67.6-86.4) | 0.117 (0.082-0.168) | <0.001 |

Abbreviations: SEER, Surveillance, Epidemiology, and End Results; PSM, propensity score matching; LR, liver resection; LT, liver transplantation.
